# Supplementary material for: Lupus enhancer risk variant causes dysregulation of IRF8 through cooperative lncRNA and DNA methylation machinery
Source: PubMed Central journal article supplement (PMC8987079; doi:10.1038/s41467-022-29514-y), 2022-04-06
Supplement: 41467_2022_29514_MOESM1_ESM.pdf [file 41467_2022_29514_MOESM1_ESM.pdf]

Zhou *et al.*

**CRISPRa screen on a genetic risk locus shared by multiple autoimmune diseases identifies a dysfunctional enhancer that affects *IRF8* expression through cooperative lncRNA and DNA methylation machinery**

Supplementary information

## Supplementary Figures

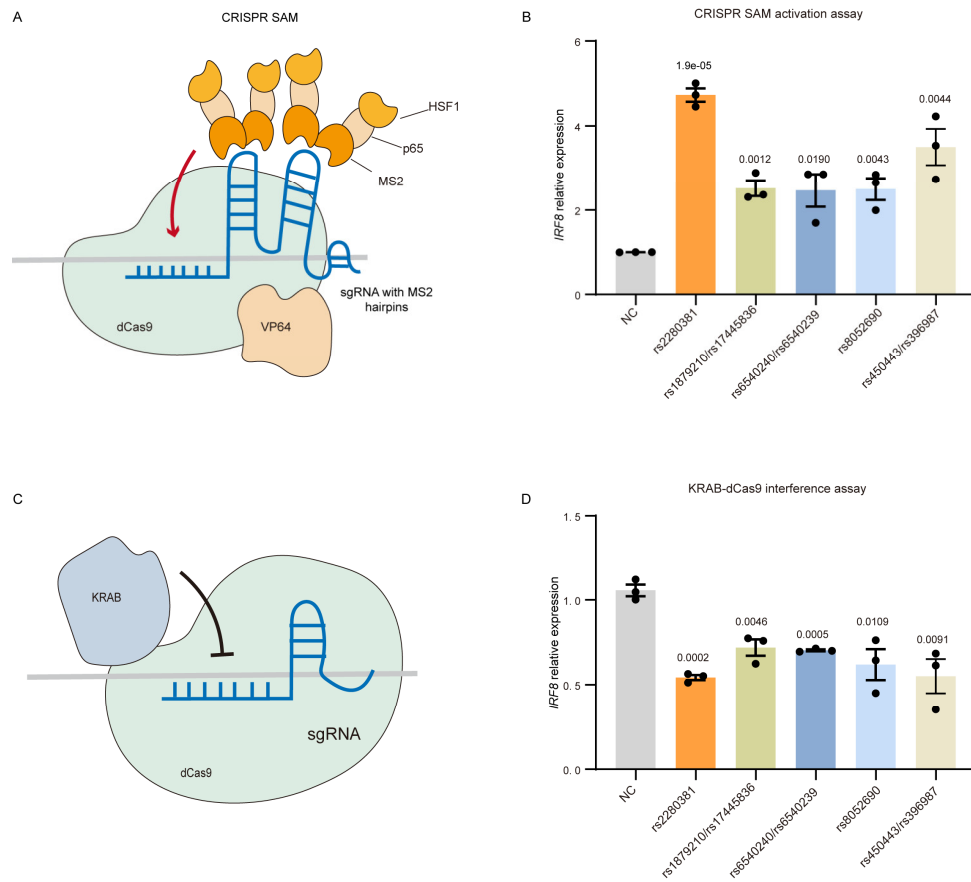

**Supplementary Fig. 1 Related to Fig. 1: CRISPR screen identifies the functional genetic variants' regions regulating *IRF8* expression.** (A) The components of CRISPR SAM activation system. (B) RT-qPCR analysis of *IRF8* expression in the CRISPR SAM activation experiment (n = 3, biologically independent experiments). (C) The components of KRAB-dCas9 system. (D) RT-qPCR analysis of *IRF8* expression in the KRAB-dCas9 interference experiment (n = 3, biologically independent experiments). Data are represented as mean  $\pm$  SEM, and *P*-values are calculated using an unpaired two-tailed Student's *t*-test.

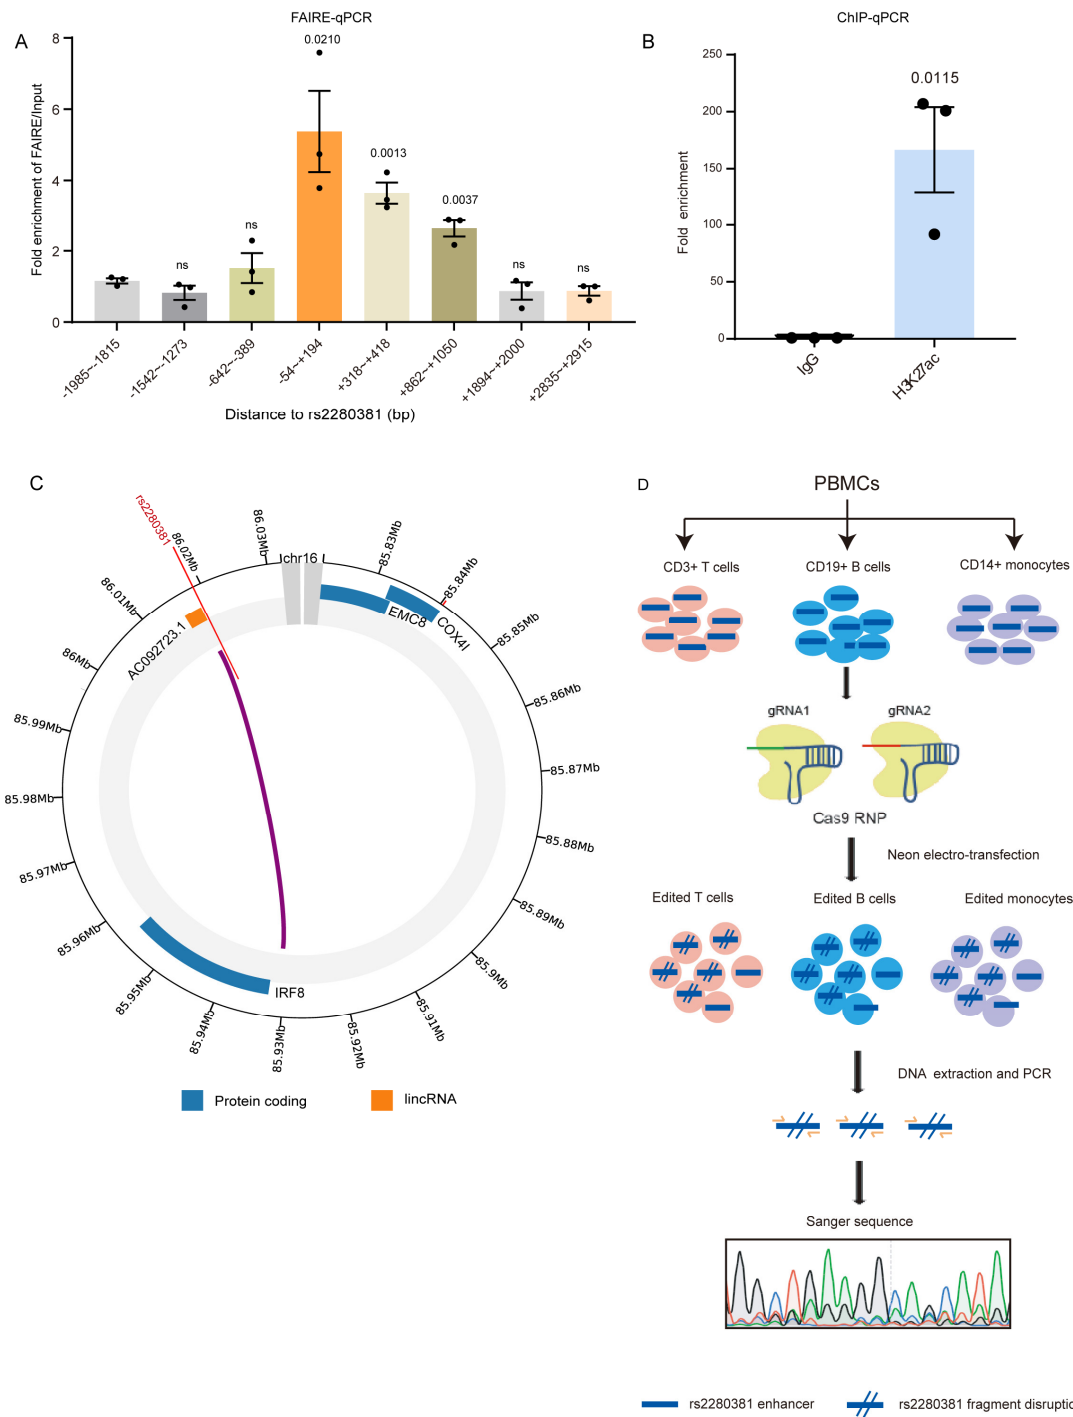

**Supplementary Fig. 2 Related to Fig. 2:** (A) FAIRE-qPCR analysis of chromatin accessibility within the rs2280381-containing region (n =3, biologically independent experiments). (B) Analysis of H3K27ac signal within the rs2280381-containing region in U-937 cells by ChIP-qPCR (n =3, biologically independent experiments). (C) The circos plot visualizing significant *cis* interactions detected by 4C-seq in primary

monocytes. The black circle represents the topologically associated domain (TAD) domain around rs2280381. For each gene in this region, coding genes are depicted (without the exon/intron details) in blue and lncRNAs are depicted in orange. The orange line indicates the position of rs2280381, the purple line indicates the connection between the *IRF8* promoter and rs2280381. **(D)** Flow scheme of CRISPR-mediated fragment disruption in isolated primary cells. Data are represented as mean  $\pm$  SEM, and *P*-values are calculated using an unpaired two-tailed Student's *t*-test. ns: not significant.

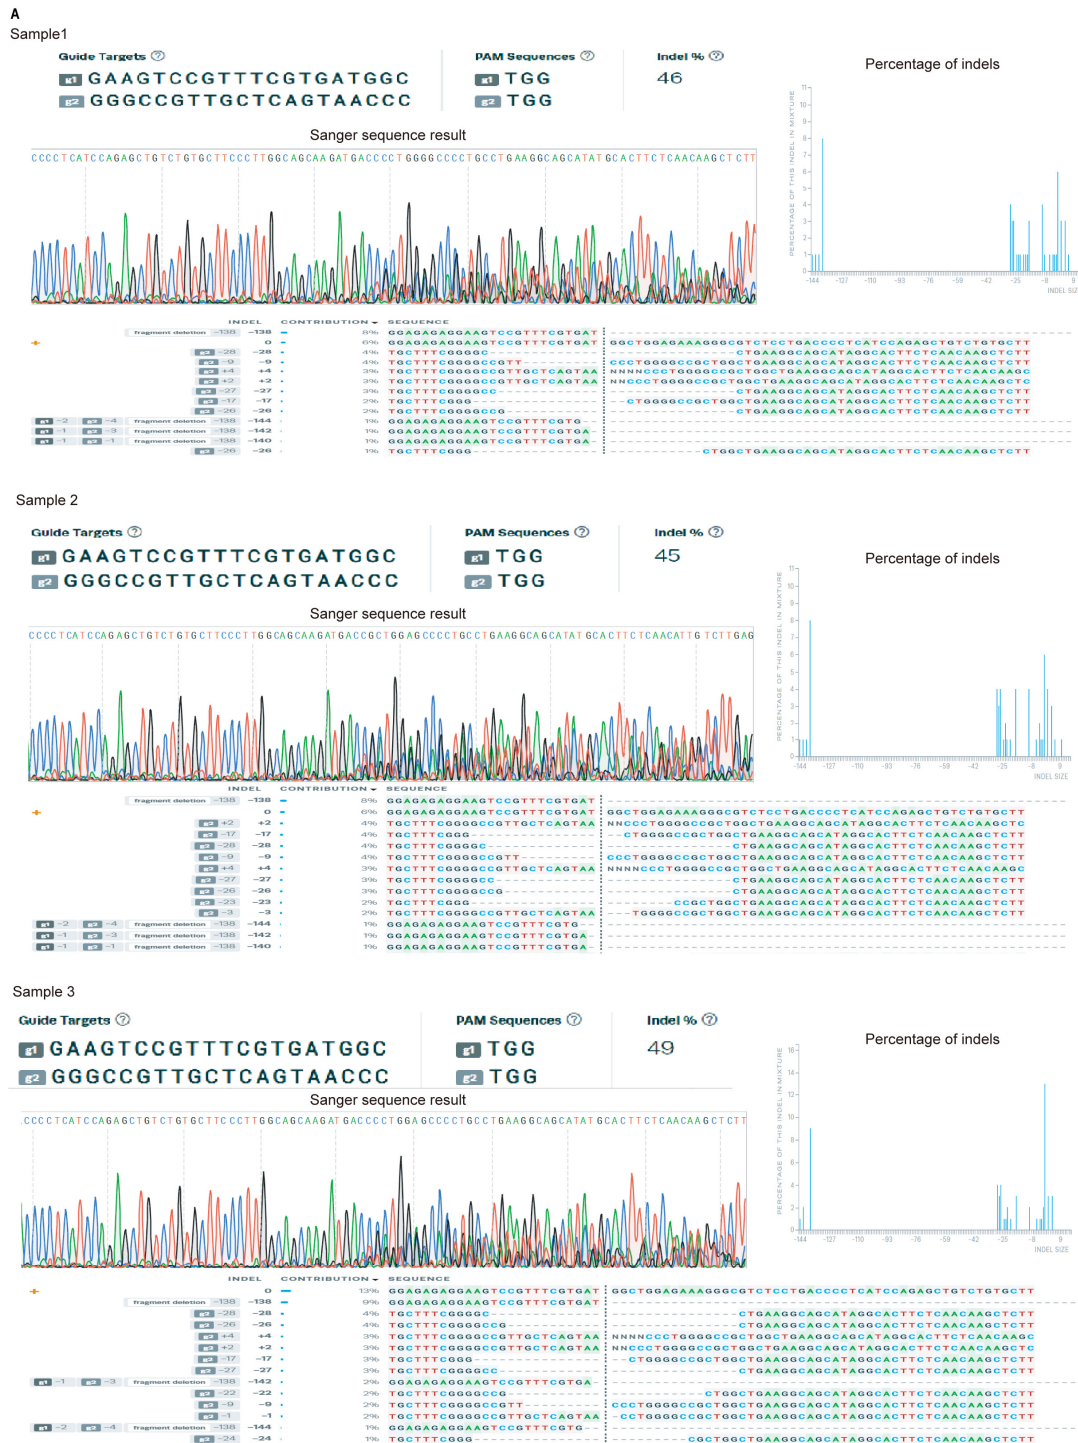

Supplementary Fig. 3 Related to Fig. 2: ICE analysis the of the indel frequency at rs2280381 locus in the edited human CD3+ T cells.

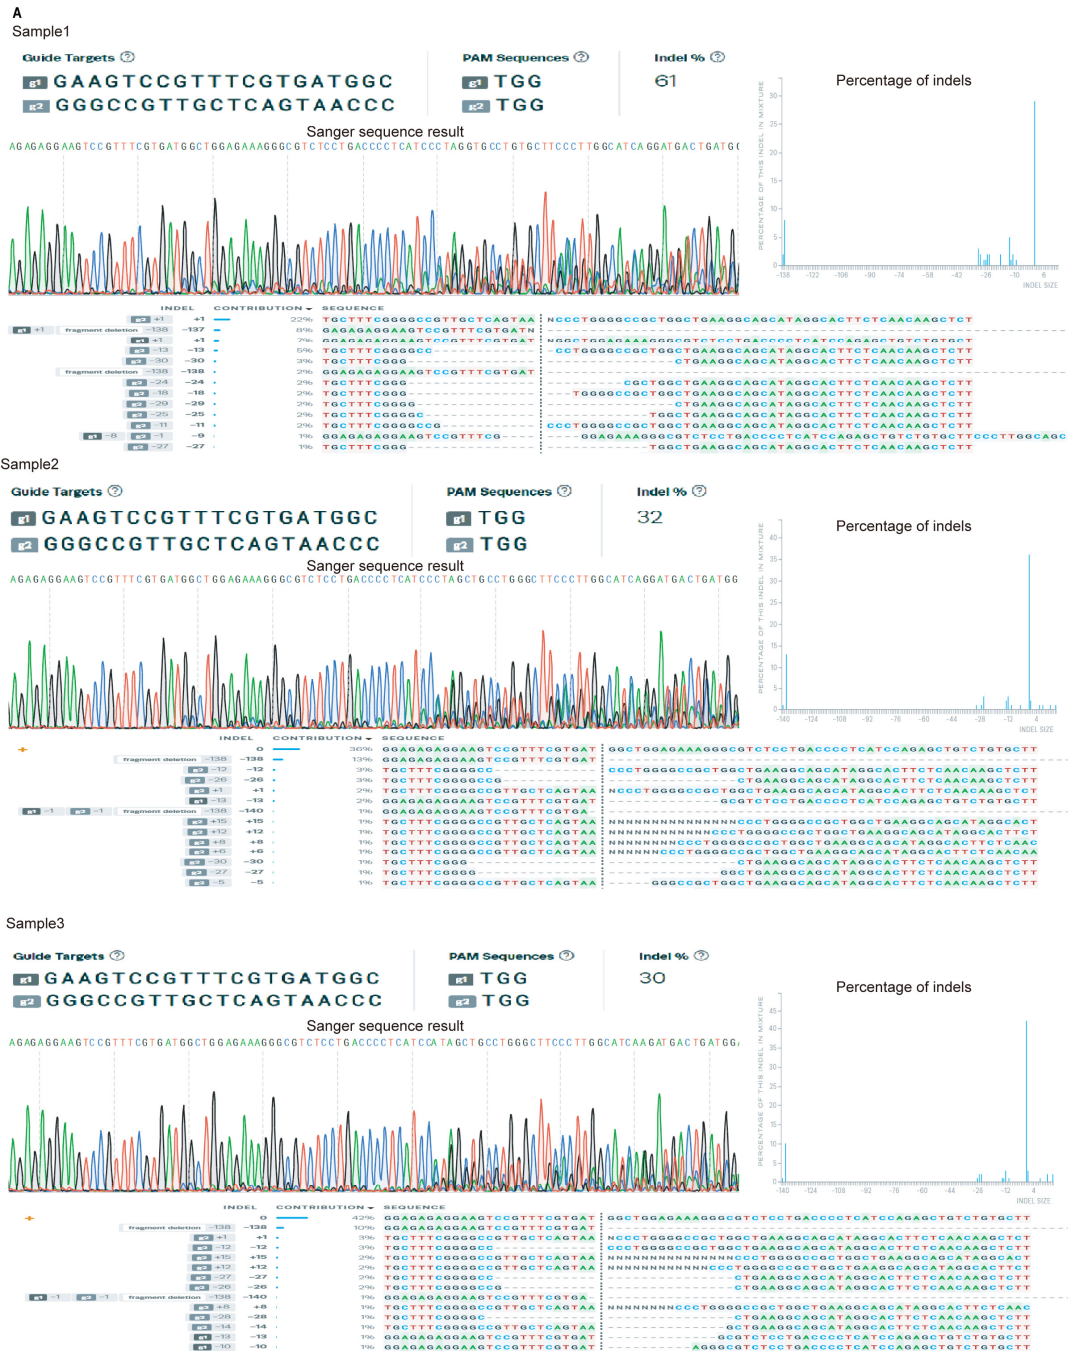

**Supplementary Fig. 4 Related to Fig. 2: ICE analysis the of the indel frequency at rs2280381 locus in the edited human CD19+ B cells.**

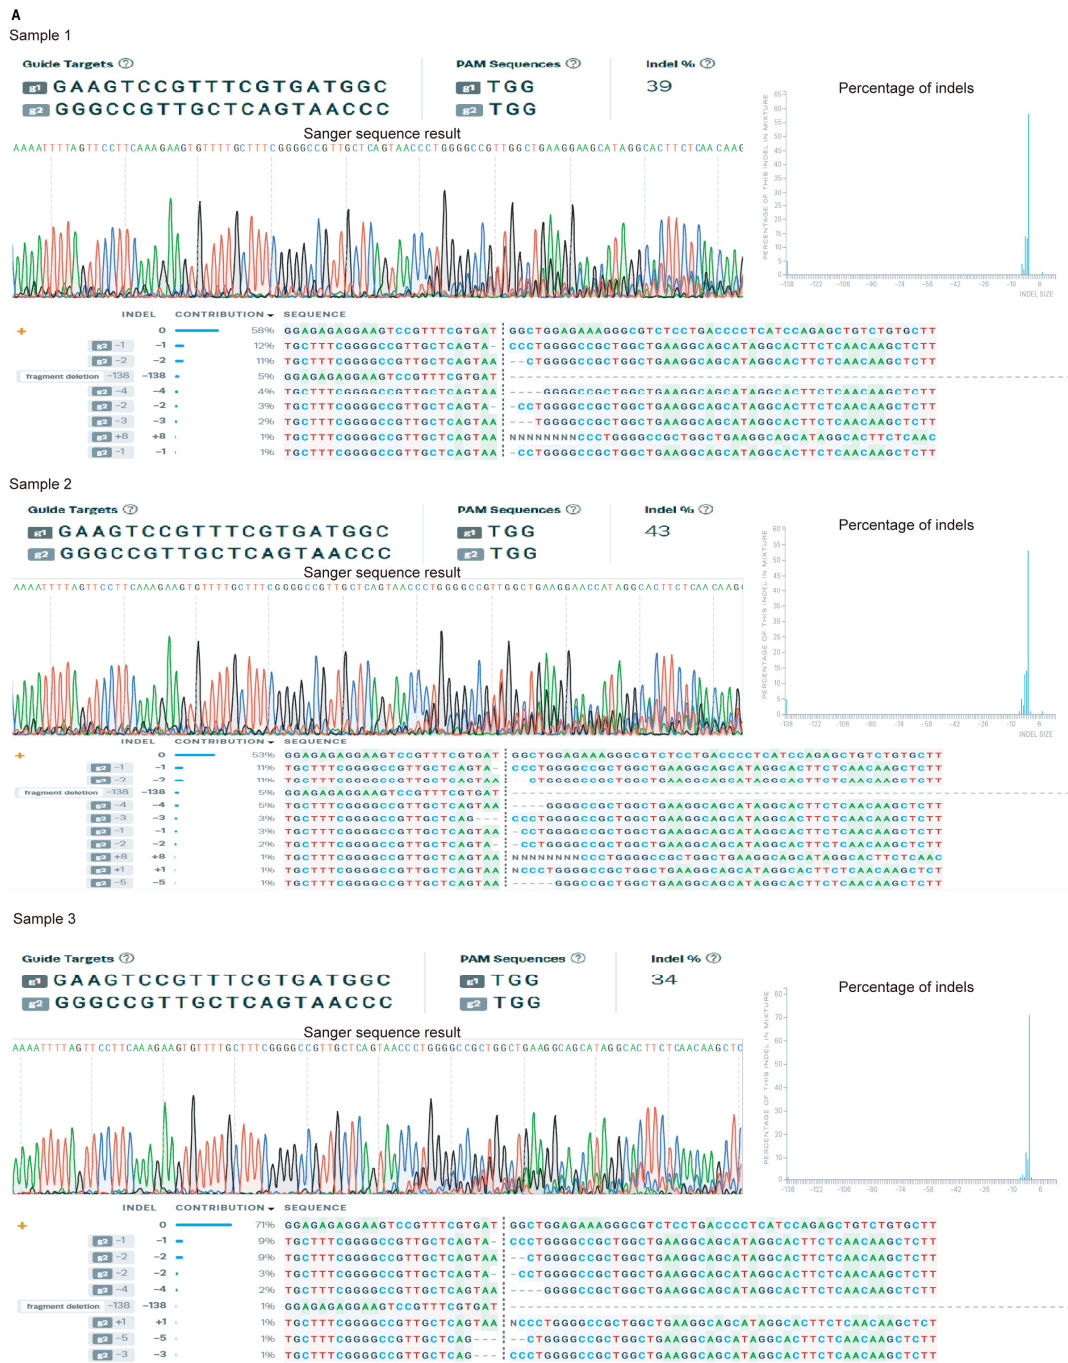

**Supplementary Fig. 5 Related to Fig. 2:** ICE analysis the of the indel frequency at rs2280381 locus in the edited human CD14+ monocytes.

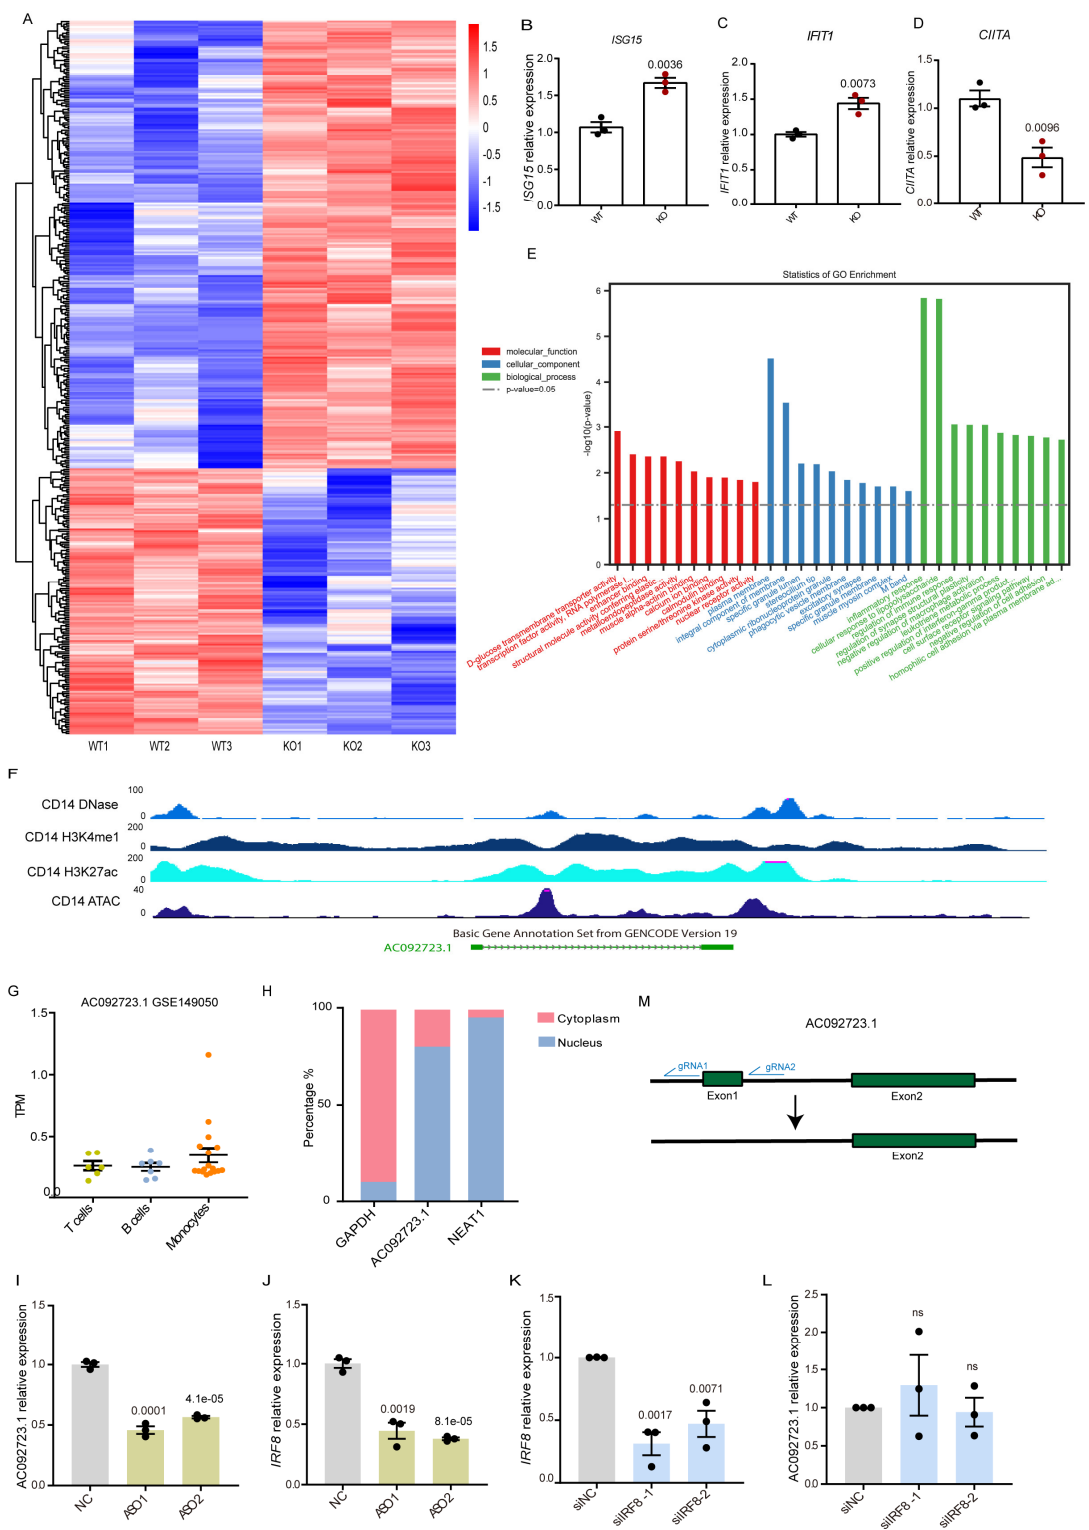

**Supplementary Fig. 6 Related to Fig. 3:** (A) The heatmap of differentially expressed genes regulated by the rs2280381-containing region as measured by RNA-seq (log2 fold change  $\geq 1$  and  $FDR < 0.05$ ). The red and blue colors in the heat map depict higher and lower gene expression, respectively. The color intensity indicates the magnitude of the expression differences. (B-D) RT-qPCR analysis of *ISG15*, *IFIT1* and *CIITA*



expression in WT and rs2280381 KO clones (n = 3, biologically independent samples). WT: rs2280381 wildtype, KO: 138 bp fragment containing the rs2280381 deletion. **(E)** Top 10 GO categories associated with differentially expressed genes. Categories were ranked by  $-\log_{10}$  (*P* value). **(F)** AC092723.1 is located in an enhancer region with strong H3K4me1, H3K27ac, DNase and ATAC signals. **(G)** AC092723.1 expression in different human immune cell subpopulations as measured by RNA sequencing from public database. **(H)** RT-qPCR analysis of AC092723.1 abundance in nuclear and cytoplasmic fractions of U-937 cells. *GAPDH*, cytoplasmic marker. NEAT1, nuclear marker, (n = 3, biologically independent experiments). **(I-J)** RT-qPCR analysis of AC092723.1 and *IRF8* expression with or without AC092723.1 knockdown in U-937 cells (n = 3, biologically independent experiments). **(K-L)** RT-qPCR analysis of AC092723.1 and *IRF8* expression with or without *IRF8* knockdown in U-937 cells (n = 3, biologically independent experiments). **(M)** Deletion of the exon1 fragment of AC092723.1 using CRISPR-Cas9. Data are represented as mean  $\pm$  SEM, and *P*-values are calculated using an unpaired two-tailed Student's t-test. ns: not significant.

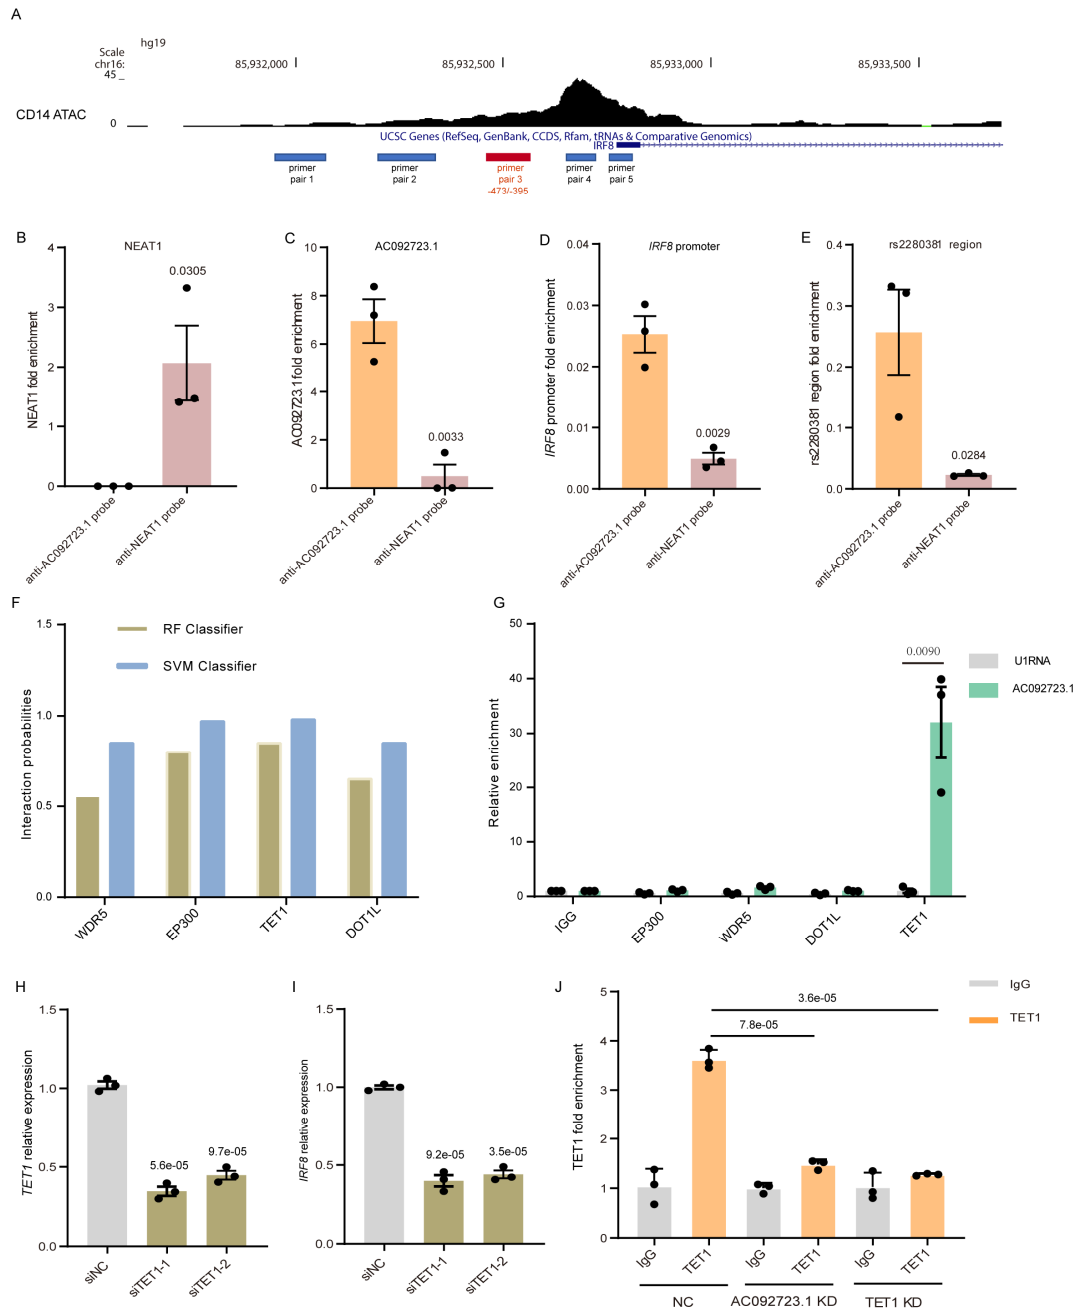

**Supplementary Fig. 7 Related to Fig. 4:** (A) The position of ChIRP primers in the *IRF8* promoter region. (B-C) NEAT1 RNA and AC092723.1 RNA are enriched explicitly with anti-NEAT1 probes (B) and anti-AC092723.1 probes (C) in ChIRP assay in U-937 cells, respectively (n = 3, biologically independent experiments). (D-E) AC092723.1 interacts with the *IRF8* promoter region (D) and rs2280381-containing region (E) in U-937 cells (n = 3, biologically independent experiments). (F)

Bioinformatic analysis of AC092723.1 interacted chromatin modifiers using online tool RPISeq based on random forest (RF) or support vector machine (SVM) models. Interaction probabilities generated by RPISeq range from 0 to 1, predictions with probabilities > 0.5 indicating that the corresponding RNA and protein are likely to interact. **(G)** RIP-qPCR analysis of the interaction between AC092723.1 and predicted binding chromatin modifiers in U-937 cells (n = 3, biologically independent experiments). **(H-I)** RT-qPCR analysis of *TET1* (H) and *IRF8* (I) expression in U-937 cells after knockdown of *TET1* by siRNA (n = 3, biologically independent experiments). **(J)** ChIP-qPCR analysis of the binding efficiency of TET1 to the *IRF8* promoter with or without AC092723.1 knockdown in U-937 cells (n = 3, biologically independent experiments). Data are represented as mean  $\pm$  SEM, and *P*-values are calculated using an unpaired two-tailed Student's t-test.

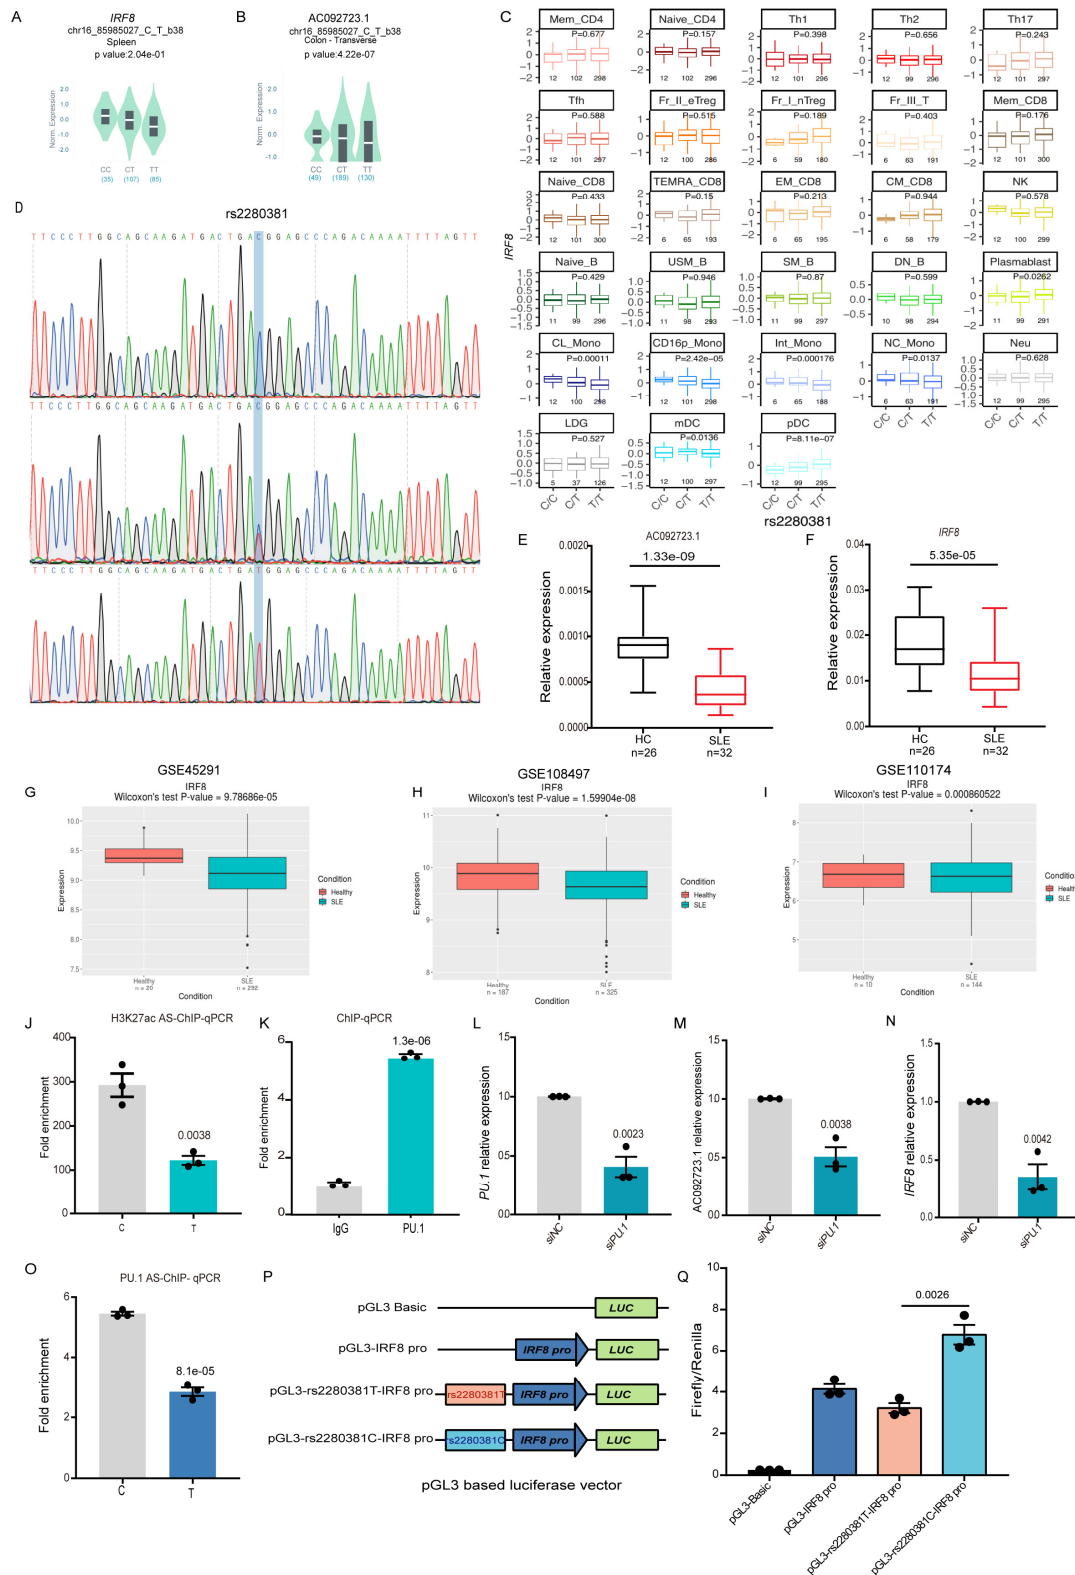

**Supplementary Fig. 8 Related to Fig. 5: (A-B)** GTEx data analysis of the eQTL between *IRF8* or *AC092723.1* and rs2280381 allele. **(C)** The box plot for eQTL result between *IRF8* and rs2280381 allele in different immune cell subpopulations from ImmuNexUT database. **(D)** Genotype of clones was identified by Sanger Sequence. **(E-**

**F)** The box plot for AC092723.1 and *IRF8* expression in SLE patients examined by RT-qPCR (n = 26 biologically independent samples for HC, n = 32 biologically independent samples for SLE). **(G-I)** Public RNA profiling data indicates the low expression of *IRF8* in SLE patients in box plot format. **(J)** rs2280381 non-risk C allele enriched more H3K27ac marks than risk T allele, as determined by AS-ChIP-qPCR in the rs2280381 heterozygous U-937 cell clone (n = 3, biologically independent experiments). **(K)** Relative enrichment of PU.1 binding to the rs2280381-containing region, as measured by ChIP-qPCR in U-937 cells (n = 3, biologically independent experiments). **(L-N)** Relative expression of *PU.1* (L), AC092723.1 (M) and *IRF8* (N) after PU.1 siRNA-mediated knockdown, as measured by RT-qPCR in U-937 cells (n = 3, biologically independent experiments). **(O)** PU.1 prefers binding to the rs2280381 C non-risk allele, as determined by AS-ChIP-qPCR in the rs2280381 heterozygous U-937 cell clone (n = 3, biologically independent experiments). **(P)** Plasmid schematic of *IRF8* promoter pGL3 and rs2280381 enhancer-*IRF8* promoter pGL3 luciferase report vector. **(Q)** Luciferase reporter assay with PU.1 over-expression in HEK-293T cells (n = 3, biologically independent experiments). Box plot: centre line, median; box limits, the interquartile range (IQR); and whiskers, the maximum and minimum values no further than  $1.5 \times$  IQR from the hinge. Data are represented as mean  $\pm$  SEM and *P*-values are calculated with two-sided tests for linear regression coefficients without adjustment by multiple comparisons (A-C) or an unpaired two-tailed Student's t-test (E-F, J-O, Q) or a two-sided Wilcoxon signed-rank test (G-I).

## Supplementary Tables

### Supplementary Table 1

#### RT-qPCR primers used in this study

| RT-qPCR Primer | Sequence (5'-3')        |
|----------------|-------------------------|
| GAPDH-F        | GGAGCGAGATCCCTCCAAAAT   |
| GAPDH-R        | GGCTGTTGTCATACTTCTCATGG |
| IRF8-F         | ATCAAAGGAGCCCTTCCCC     |
| IRF8-R         | GGGAGAATGCTGAATGGTGC    |

|              |                        |
|--------------|------------------------|
| AC092723.1-F | TGTGGTTTCAATGGAGCCCT   |
| AC092723.1-R | TGTGCTACACAGGAAACGCT   |
| UIRNA-F      | CCATGATCACGAAGGTGGTTT  |
| UIRNA-R      | ATGCAGTCGAGTTTCCACAT   |
| TET1-F       | TAGCCCAACTCTCTCAGGCT   |
| TET1-R       | GCACTGGCATAGTCACCACT   |
| PU.1-F       | CCTGAGGGGCTCTGCATTG    |
| PU.1-R       | GAAGTTGTTCTCGGCGAAGC   |
| ISG15-F      | CGCAGATCACCCAGAAGATCG  |
| ISG15-R      | TTCGTCGCATTTGTCCACCA   |
| IFIT1-F      | AGAAGCAGGCAATCACAGAAAA |
| IFIT1-R      | CTGAAACCGACCATAGTGAAAT |
| CIITA-F      | CCTGGAGCTTCTTAACAGCGA  |
| CIITA-R      | TGTGTCGGGTTCTGAGTAGAG  |

**Supplementary Table 2**

**4C-seq primer used in this study**

| Name         | Sequence (5'-3')   |
|--------------|--------------------|
| P5-381-MN-F  | GAAACCACAAGTCGGATC |
| P7-381-MN-R  | AGAAGTGAATGCCGAAGC |
| P5-IRF8-CN-F | CCAGTTCCTGTAATGTAC |
| P7-IRF8-CN-R | AAGACCATTTTTCTGGCT |

**Supplementary Table 3**

**FAIRE-qPCR primer**

| Name        | Forward (5'-3')      | Reverse (5'-3')      |
|-------------|----------------------|----------------------|
| -1985~-1815 | ATAAGTGTGGAGCGCTTGCT | CCAGCTTCACCCATCACTGT |
| -1542~-1273 | CGTTCAGGTGGGACTGAGAC | CAGAGCCAGACACCAGGAAG |
| -642~-389   | CCGAGGATGGATCCGACTTG | CCAAGGTTCCAACAGCTTGC |
| -54~+194    | TCCTGACCCCTCATCCAGAG | AAGACAGAGAGAACGCGGTG |
| +318~+418   | GCTCCAAGCATGGTCAGACT | CTCAGGGTATTTCTGGGCG  |
| +862~+1050  | CGTAGTGACACCAACCACGA | GCGATCCCCATTTCACAGA  |
| +1894~+2000 | TGCCTCCGTAAGTCCAACAC | GTTTCTCAGCTGGGAGGGAC |
| +2835~+2915 | CCTGTTGGGCTGCTGGATAA | GGCTCATATTCTCGGGAGGC |

**Supplementary Table 4**

**Allele-specific qPCR primer**

| Allele specific primer | Sequence (5'-3')   |
|------------------------|--------------------|
| 381-AS-C-F             | GGCAGCAAGATGACTGAC |

|            |                    |
|------------|--------------------|
| 381-AS-T-F | GGCAGCAAGATGACTGAT |
| 381-AS-R   | CCAGGCGTGTACTCAAGA |

**Supplementary Table 5**

**CHIRP probe sequences used in this study**

| probe        | Sequence (5'-3')     |
|--------------|----------------------|
| AC092723.1-1 | AACCACAAGTCGGATCCATC |
| AC092723.1-2 | CTCACGGAGAGGGTAAGTGA |
| AC092723.1-3 | TTTGGGAGAAGAGTCTGTGC |
| AC092723.1-4 | GAATTGGGACATTGGTGTGG |
| AC092723.1-5 | GCATTCAGTTCTACTCTTTT |
| AC092723.1-6 | CGTTTCCAAGGTTCCAACAG |
| AC092723.1-7 | AATTACAGGCAGAGGCAAGA |
| AC092723.1-8 | ACCTACTTTCATCCTTACAA |
| Neat1-1      | GCAAAGGTACATGGATTCTG |
| Neat1-2      | ATTTAGGTGATAGTTTCCC  |
| Neat1-3      | CATGTAGTAAAGGCACCTCG |
| Neat1-4      | CCATTGGTATTACTTTACCA |
| Neat1-5      | GGTAAAGAACTGAACTACCA |
| Neat1-6      | TTGTTTGCATCATCCCCAAG |

**Supplementary Table 6**

**CHIRP experiment detection primer**

| CHIRP detection primer | Sequence (5'-3')             |
|------------------------|------------------------------|
| Neat1-F                | AGCTGCGTCTATTGAATTGGTAAAGTAA |
| Neat1-R                | GACAGAAAGATCCCAACGATAAAAATAA |
| RT-AC092723.1-F        | TGTGGTTTCAATGGAGCCCT         |
| RT-AC092723.1-R        | TGTGCTACACAGGAAACGCT         |
| rs2280381-F            | GCCCCGAAAGCAAACACTT          |
| rs2280381-R            | CTCCTGACCCCTCATCCAGA         |
| IRF8-pro-1F            | ATGCCAGGAGTTGACCTGTG         |
| IRF8-pro-1R            | GCAGAGCATGGTCCCAGATT         |
| IRF8-pro-2F            | TAAAAGCCAATCGCGACCTT         |
| IRF8-pro-2R            | TGGGTGGGCGTTAAGATGTC         |
| IRF8-pro-3F            | ATATCCAGCGCTCGTGAAGG         |
| IRF8-pro-3R            | CCTGCGGCCCATTAATCAGA         |
| IRF8-pro-4F            | GCCTAGCACCTTCGATGCTC         |
| IRF8-pro-4R            | GTCGTTTACAGACCGTCCCG         |

**Supplementary Table 7**

### ChIP-qPCR primer

| Name      | Sequence (5'-3')     |
|-----------|----------------------|
| 381CHIP-F | CTCCTGACCCCTCATCCAGA |
| 381CHIP-R | GCCCCGAAAGCAAAACACTT |

### Supplementary Table 8

#### CRISPRa screen gRNAs

| Target                                | gRNA1 (5'-3')         | gRNA2 (5'-3')        | gRNA3 (5'-3')         |
|---------------------------------------|-----------------------|----------------------|-----------------------|
| IRF8 promoter                         | TGGAGCGCGGCAGCAAGCGT  | TTTAAAGCCGCGGACCGC   | ACGGCGGCAGGTAGGCACAG  |
| rs186249                              | CACAGGCACCACTAACGCTT  | AGATTATGCCAGCAATCAAA | TGTGGAGGATCTGGTGTACA  |
| rs2280381                             | CTTGGCAGCAAGATGACTGA  | AGCACAGACAGCTCTGGATG | AAGGAACTAAAATTTGTCT   |
| rs8052690                             | GTGAGCCATCGACCTCACAG  | GGTGCTCTGGACTGATGAAA | GTA CTCTGCCCAAGCACTT  |
| rs8045825/<br>rs8059144               | CAGAGCAGGCACTCGAGCGA  | GCGTGTCAGTCCACTCCCG  | GCCTAGAACTCAAACAGAG   |
| rs4843867/<br>rs4843866               | CTTGCTGAATGGGGACCAAG  | CGATCACCAGGAGCCTCTCA | GTTAGCTCTCGCTAATGAA   |
| rs10711573<br>/<br>rs11117432         | GACAAACAAAACGTTGGAGG  | TGGGCTTAATTGGAAAACC  | AAAAAAAACCCAACAGTGTG  |
| rs4843865                             | CAACGACTCTGCGATGACG   | AGCAAGGAGATGTTGATGG  | CTCTTGGGTCCCTTCAAGCT  |
| rs11347703                            | GCTCCGGGCACCCACGCTCT  | GGGGTGGCAGATGTCCTCAG | TCTGTGTGAGATTCCATGG   |
| rs450443/<br>rs396987                 | CACGTGTCCGTCACCTTATG  | GCGCATCCGTGACACGACCT | TCCCTAAAATGTATAAAACC  |
| rs731708                              | GAGGCAGGCAGTGAACGGA   | CGGGAGGAGGCTGACCTGGT | TGAGAGGGAGCCACGCAGAA  |
| rs12149636                            | GCTCTTGCAAGATGTTGGGA  | CTGTCTAGATAAACAGACTG | AGGTGGCATGGTATGTTTAC  |
| rs11117431                            | AGATCTCGTCTCACTATACA  | ACAAGAAAATGAACTAGCC  | CCTCCA ACTCTGGGCTCAA  |
| rs6540241/<br>rs6540242/<br>rs6540243 | GTGAAATGGGGGATCGCCGG  | GGGGAAGGTAGGGGGCACAG | CTAGAAAATTGCAGAAAGAA  |
| rs11117433                            | GGTG TCACTACGTATCCGAA | CAACCACGAGGTGGTCGGTG | CTGCTGGAGGTGCAAGACCA  |
| rs1879210/<br>rs17445836              | TGTCCCTAAACCAAGGCACG  | GGGACAAGAGCCTCTGTCTC | TAGAAGGTGAGCCCGCAGCT  |
| rs7203487                             | AAGTGTGGAGCGCTTGCTCT  | GCTATGGTCTGCTTAGCACA | GTTCTTATCTCATAGTGTCT  |
| rs6540240/<br>rs6540239               | GGCTCCCACTCATCAGGACC  | AAGACAGAGAGAACGCGGTG | TACCCGTAATATGAACGCAG  |
| rs13330176                            | TTAGTTGTCTAATTTTCTCA  | TGACTTTAACCTGCAGGTC  | TTTTGACACCGTGTCCGCC   |
| rs9674233                             | GCATCACAGAGCCGGTGTGA  | TCAGTGATGGGTTTATGGCA | GTA ACTGGTGGCGTTTCCAT |
| rs7202472                             | GAAGAGCCATGGACCATATG  | GACACTGTGACTCTGAGTCA | ACTAACTGCCCAAGCTCAG   |
| rs9933582                             | GTGTCCCTCAA ACTCAGGCC | ATAAGGCCTCCCGCAGTGCC | AATGAGAAGCGGGGACAGA   |



|           |                      |                      |                      |
|-----------|----------------------|----------------------|----------------------|
| rs9927316 | GCCTCTCGTCTCCGTGTAAG | CTGACCGTTGAGACCTGGCG | GGCTCTCGTGTCAGTGGGT  |
| rs7193275 | AATTCCTGTTTATTAAGGAC | ACAGACCAAGCATCTGTACC | AGCACAGACAGCTCTGGATG |
| rs9939427 | CGGGGTGAATTGTGGTTGGG | GGACCTGTGAGCACCAGGGG | CTGATTCTGCCAAGTCCCCC |

### Supplementary Table 9

#### rs2280381 Prime editing gRNAs

| rs2280381 Prime editing  | Sequence (5'-3')             |
|--------------------------|------------------------------|
| pegRNA                   | CTTGGCAGCAAGATGACTGA         |
| RT template+PBS sequence | TCTGGGCTCCATCAGTCATCTTGCTGCC |
| nick gRNA                | GCCCCAGGGTTACTGAGCAA         |

### Supplementary Table 10

#### Knockout gRNAs used in this study

| KO gRNA | Sequence (5'-3')     | Target              |
|---------|----------------------|---------------------|
| gRNA1   | GAAGTCCGTTTCGTGATGGC | rs2280381 KO        |
| gRNA2   | GGGCCGTTGCTCAGTAACCC | rs2280381 KO        |
| gRNA3   | AGATCTCGTCTCACTATACA | AC092723.1 exon1 KO |
| gRNA4   | AGTCCATCACTGCTCCAGGA | AC092723.1 exon1 KO |

### Supplementary Table 11

#### ASO used in this study

| AC092723.1 ASO name | Sequence (5'-3')               |
|---------------------|--------------------------------|
| ASO nc              | G*C*A*A*T*CGTGAGCAGA*C*C*C*T   |
| ASO-1               | C*C*T*C*A*CGGAGAGGGT*A*A*G*T*G |
| ASO-2               | G*C*C*T*T*CATGCCCTCT*G*C*G*T*T |

\* Stand for Phosphorothioate modification

### Supplementary Table 12

#### siRNA used in this study

| siRNA Name | sense (5'-3')          | antisense (5'-3')     |
|------------|------------------------|-----------------------|
| si-IRF8-1  | CCAUAACAAAGUUUACCGAAUU | AAUUCGGUAAACUUUGUAUGG |
| si-IRF8-2  | GCCCCGAUCAUGAUUAAAGAA  | UUCUUUAAUCAUGAUGCAGGC |
| si-PU.1-1  | GCAAGAAGAUGACCUACCA    | UGGUAGGUCAUCUUCUUGC   |
| si-PU.1-2  | CAGAAGACCUGGUGCCCUA    | UAGGGCACCAGGUCUUCUG   |
| si-TET1-1  | GCAGCUAAUGAAGGUCCAGAA  | UUCUGGACCUUCAUAGCUGC  |
| si-TET1-2  | CCUCCAGUCUUAUAAGGUUA   | UAACCUUAUUAAGACUGGAGG |

### Supplementary Table 13

**DNA Pull down oligo used in this study**

| <b>oligo</b> | <b>Sequence (5'-3')</b>                                         |
|--------------|-----------------------------------------------------------------|
| 381-C-F      | TGTGCTTCCCTTGGCAGCAAGATGACTGACGGAGCCCAGACAAAATTTTAGTTCCTC<br>A  |
| 381-C-R      | TGAAGGAACTAAAATTTTGTCTGGGCTCCGTCAGTCATCTTGCTGCCAAGGGAAGCA<br>CA |

**Supplementary Table 14**

**DNA methylation analysis primer**

| <b>Bisulfite Conversion PCR</b> | <b>Sequence (5'-3')</b> |
|---------------------------------|-------------------------|
| Methy-F                         | GTGGATTTTGATTAATGGGT    |
| Methy-R                         | AAAACCTTCCCAAAAATTCC    |

**Supplementary Table 15**

**Primers used to construct luciferase reporter plasmid**

| <b>Primer name</b> | <b>Sequence</b>                          |
|--------------------|------------------------------------------|
| LUC-IRF8-F         | TCTGCGATCTAAGTAAGGACCTCTTAACGCTGACG      |
| LUC-IRF8-R         | ACCGGAATGCCAAGCTTAGGC AAAAAGCAGAGAGGG    |
| LUC-381-F(NheI)    | <u>CTAGCTAGCT</u> ACCATAGGAAACAGGCCTGGAG |
| LUC-381-R(SacI)    | <u>CGAGCTCGT</u> GAGAAGTGCCTATGCTGCC     |
